# Supplementary material for: The Impact of ALS-Associated Genes hnRNPA1, MATR3, VCP and UBQLN2 on the Severity of TDP-43 Aggregation
Source: PubMed Central journal article supplement (PMC7465640; doi:10.3390/cells9081791), 2020-07-28
Supplement: cells-09-01791-s001.pdf [file cells-09-01791-s001.pdf]

## Supplementary data

Table S1: Primer sequences for PCR to clone TDP-43 sequence into mKO2-C1 plasmid.

| Primer Name        | Sequence                                                |
|--------------------|---------------------------------------------------------|
| Sall koz TDP-43 Fw | AAA AGT CGA CGC CAC CAT GGC CTC TGA ATA TAT TCG GGT AAC |
| TDP-43 BamHI Rev   | AAA GGA TCC GGC ATT CCC CAG CCA GAA GAC TTA G           |

Table S2: Primer sequences for PCR to clone mKO2-TDP-43 sequence into pcDNA5/FRT/TO plasmid

| Primer Name | Sequence                                                                                           |
|-------------|----------------------------------------------------------------------------------------------------|
| FRT KO2 Fw  | GTT TAA ACT TAA GCT GCC ACC ATG GTG AGT GTG AT                                                     |
| TDP HA Rev  | TAG ACT CGA GCG GCC TCC CTA AGC GTA ATC TGG AAC ATC GTA TGG<br>GTA CAT TCC CCA GCC AGA AGA CTT AGA |

Table S3: Primer sequences for site-directed mutagenesis to produce dNLS C-terminally shortened TDP-43 fragments. Nucleotide change sites are in small caps and underlined.

| Primer Name      | Sequence                                                                                   |
|------------------|--------------------------------------------------------------------------------------------|
| TDP dNLS Fw      | GTG TAT GTT GTC AAC TAT CCA AAA GAT AAC GCA GTC CAG AAA<br>ACA TCC G                       |
| TDP dNLS Rev     | CGG ATG TTT TCT GGA CTG CGT TAT CTT TTG GAT AGT TGA CAA<br>CAT ACA C                       |
| TDPdNLS stop Fw  | CTT CTG GCT GG GGA ATG <u>tag</u> TAC CCA TAC GAT GTT CCA G                                |
| TDPdNLS stop Rev | CTG GAA CAT CGT ATG GGT <u>A<sub>ct</sub> a<sub>CA</sub></u> TTC CCC AGC CAG AAG           |
| TDP dNLSd343 Fw  | ATG GGC ATG TTA GCC AGC CAG <u>t</u> AG AAC CAG TCA GGC CCA T                              |
| TDP dNLSd343 Rev | ATG GGC CTG ACT GGT TCT <u>a</u> CT GGC TGG CTA ACA TGC CCA T                              |
| TDP dNLSd299 Fw  | CGA ACC TAA GCA CAA TAG CAA <u>T<sub>t</sub>G</u> ACA GTT AGA AAG AAG TGG<br>AAG ATT TGG   |
| TDP dNLSd299 Rev | CCA AAT CTT CCA CTT CTT TCT AAC TGT <u>C<sub>a</sub>A</u> TTG CTA TTG TGC<br>TTA GGT TCG   |
| TDP dNLSd267 Fw  | GCA GAG GGG GTG GAG CTG GTT <u>TG<sub>t</sub></u> GAA ACA ATC AAG GTA GTA<br>ATA TGG GTG G |
| TDP dNLSd267 Rev | CCA CCC ATA TTA CTA CCT TGA TTG TTT <u>C<sub>a</sub>C</u> AAA CCA GCT CCA<br>CCC CCT CTG C |

Table S4: Primer sequences to amplify gBlock DNA fragment containing HRV 3C site, Gly-Ser-Gly linker, 3x HA tag and to clone into pcDNA5/FRT/TO plasmid

| Primer Name    | Sequence                                                    |
|----------------|-------------------------------------------------------------|
| HRV 3C site Fw | AGT GGC GGC CGC TCG AGG GAA GCG GCC TGG AAG TTC TGT         |
| Rev HRV 3xHA   | TCA GCG GGT TTA AAC GGG CCC CTA AGC GTA ATC TGG AAC GTC GTA |

Table S5: Primer sequences for subcloning ALS-associated genes into pcDNA5/FRT/TO3xHA

| Primer Name     | Sequence                                                             |
|-----------------|----------------------------------------------------------------------|
| Fw MATR3 3xHA   | GAA TTC TGC AGA TAT CAG CCA CCA TGG CGT CCA AGT CAT TCC AGC<br>AG    |
| Rev MATR3 3xHA  | TCC AGG CCG CTT CCC TCG AGA CAT CCG CCA GTT TCC TTC TTC TGT<br>CTG   |
| FwhnRNPA1 3xHA  | GAA TTC TGC AGA TAT CAG CCA CCA TGG CGT CTA AGT CAG AGT CTC<br>CTA A |
| RevhnRNPA1 3xHA | TCC AGG CCG CTT CCC TCG AGA CAT CCG CCA AAT CTT CTG CCA CTG<br>CCA   |
| Fw VCP 3xHA     | TGG AAT TCT GCA GAT ATC AGC CAC CAT GGC TTC TGG AGC CGA TT           |
| Rev VCP 3xHA    | TCC AGG CCG CTT CCC TCG AGA CAT CCG CCG CCA TAC AGG TCA TCA<br>TC    |
| Fw UBQLN2 3xHA  | ATT CTG CAG ATA TCA GCC ACC ATG GCT GAG AAT GGC GAG A                |
| Rev UBQLN2 3xHA | TCC AGG CCG CTT CCC TCG AGA CAT CCG CCC GAT GGC TGG GAG<br>CCC AG    |

Table S6: Primer sequences for site-directed mutagenesis to introduce ALS-associated mutations. Nucleotide change sites are in small caps and underlined.

| Primer Name     | Sequence                                                           | AA change |
|-----------------|--------------------------------------------------------------------|-----------|
| Fw Matr3 C-G    | TTC TTC CCA TAA TTT GCA <u>GTg</u> TAT ATT TAA CAT TGG AAG<br>T    | S85C      |
| Rev Matr3 C-G   | ACT TCC AAT GTT AA ATA <u>Tac</u> ACT GCA AAT TAT GGG AAG<br>AA    |           |
| Fw hnRNPA1 A-T  | GAG GTG GTG GAA GCT ACA ATG <u>f</u> TT TTG GGA ATT ACA<br>ACA ATC | D262V     |
| Rev hnRNPA1 A-T | GAT TGT TGT AAT TCC CAA <u>AAa</u> CAT TGT AGC TTC CAC CAC<br>CTC  |           |

|                |                                                                   |       |
|----------------|-------------------------------------------------------------------|-------|
| Fw VCP G-A     | CGA AGG GGA GCC TAT CAA Aca <u>AG</u> A GGA TGA GGA AGA<br>GTC CT | R191Q |
| Rev VCP G-A    | AGG ACT CTT CCT CAT CCT CT <u>g</u> GTT TGA TAG GCT CCC CTT<br>CG |       |
| Fw UBQLN2 C-A  | CAT AGG CCC TAT AGT Ca <u>C</u> TTT TAC CCC CAT A                 | P506T |
| Rev UBQLN2 C-A | TAT GG GGG TAA AAG <u>g</u> GA CTA TAG GGC CTA TG                 |       |

Table S7: Primer sequences used for site-directed mutagenesis to add start codon to pcDNA5/FRT/TO3xHA

| Primer Name    | Sequence                                          |
|----------------|---------------------------------------------------|
| Fw3xHA Start   | GCT CGG ATC CAC TAG GCC ACC ATG TCC AGT GTG GTG G |
| Rev 3xHA start | CCA CCA CAC TGG ACA TGG TGG CCT AGT GGA TCC GAG C |

—  
—

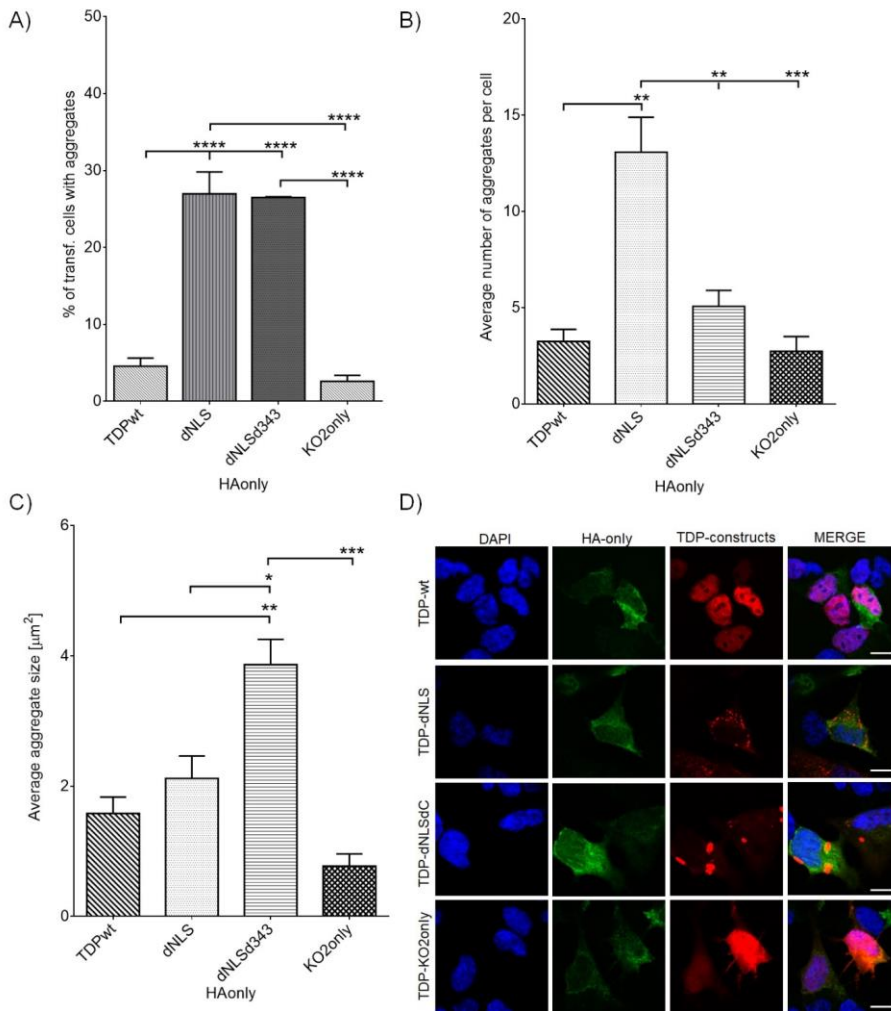

**Figure S1:** TDP-43 constructs co-transfected with plasmid HAonly. **(A)** Quantification of co-transfected cells harboring aggregates. TDPwt ( $4.6 \pm 1.05\%$ ), dNLS ( $27.0 \pm 1.64\%$ ), dNLSd343 ( $26.5 \pm 0.05\%$ ), and KO2only ( $2.6 \pm 0.45\%$ ). **(B)** Average number of aggregates in individual cells. TDPwt ( $3.2 \pm 0.63$ ), dNLS ( $13.1 \pm 1.82$ ), dNLSd343 ( $5.1 \pm 0.83$ ), and KO2only ( $2.7 \pm 0.77$ ). **(C)** Average aggregate size. TDPwt ( $1.6 \pm 0.25 \mu\text{m}^2$ ), dNLS ( $2.1 \pm 0.34 \mu\text{m}^2$ ), dNLSd343 ( $3.9 \pm 0.39 \mu\text{m}^2$ ), and KO2only ( $0.77 \pm 0.19 \mu\text{m}^2$ ). **(D)** SH-SY5Y cells co-transfected with mKO2-TDP-43 constructs and HAonly plasmid. Probed for HA-tag and counterstained with DAPI. Scale bars: 10  $\mu\text{m}$ . All experiments were performed in duplicates and repeated three times. Data are presented as mean  $\pm$  s.e.m. \* $P < 0.05$ , \*\* $P < 0.01$ , \*\*\* $P < 0.001$ , \*\*\*\* $P < 0.0001$ ; One-way ANOVA, Tukey post-hoc test.

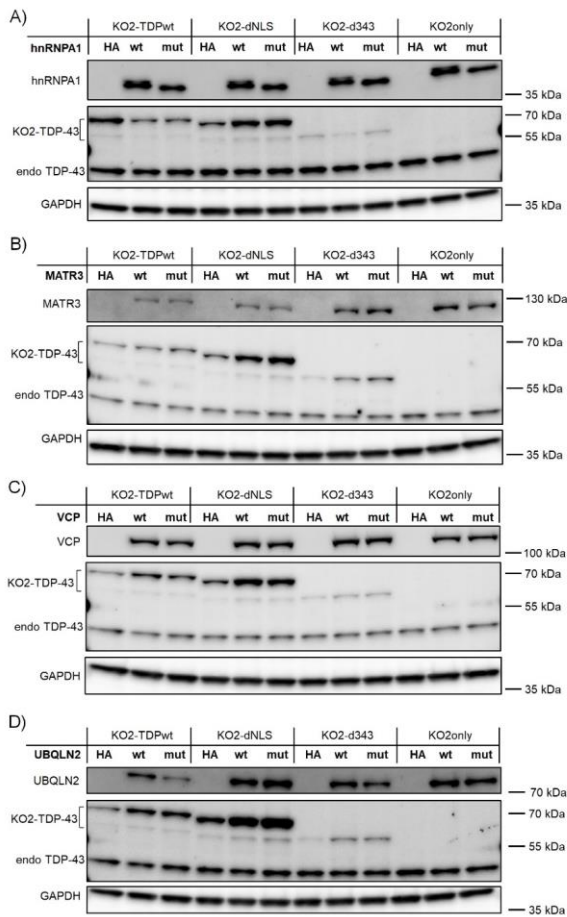

**Figure S2:** Western blots of total lysates of SH-SY5Y cells co-transfected with KO2-TDP-43 constructs and HA-tagged wild-type and mutant ALS-associated genes. **(A)** Co-transfection of wt or mut HA-tagged hnRNPA1 and TDPwt, dNLS, dNLSd343, or KO2only. **(B)** Co-transfection of wt or mut HA-tagged MATR3 and TDPwt, dNLS, dNLSd343, or KO2only. **(C)** Co-transfection of wt or mut HA-tagged VCP and TDPwt, dNLS, dNLSd343, or KO2only. **(D)** Co-transfection of wt or mut HA-tagged UBQLN2 and TDPwt, dNLS, dNLSd343, or KO2only. Plasmid containing only 3xHAtag was co-transfected with KO2-TDP-43 constructs as a baseline control. GAPDH was detected as a loading control.

Formatted: Not Highlight

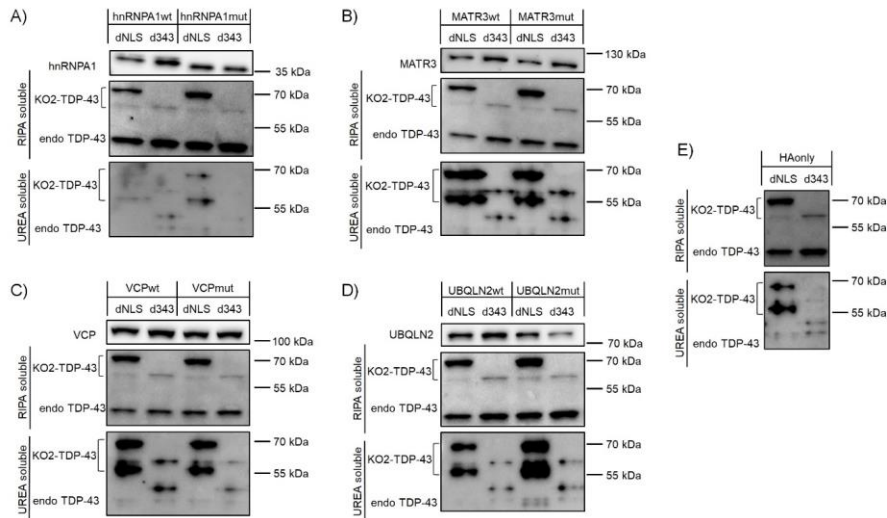

**Figure S3:** Solubility of TDPdNLS and TDPdNLSd343 constructs co-transfected in SH-SY5Y cells with HA-tagged wild-type and mutant ALS-associated genes. **(A)** RIPA soluble and UREA soluble fractions of SH-SY5Y cells co-transfected with wt or mut HA-tagged hnRNPA1 and TDPdNLS or dNLSd343. **(B)** RIPA soluble and UREA soluble fractions of SH-SY5Y cells co-transfected with wt or mut HA-tagged MATR3 and TDPdNLS or dNLSd343. **(C)** RIPA soluble and UREA soluble fractions of SH-SY5Y cells co-transfected with wt or mut HA-tagged VCP and TDPdNLS or dNLSd343. **(D)** RIPA soluble and UREA soluble fractions of SH-SY5Y cells co-transfected with wt or mut HA-tagged UBQLN2 and TDPdNLS or dNLSd343. **(E)** RIPA soluble and UREA soluble fractions of SH-SY5Y cells co-transfected with plasmid containing only 3xHATag and TDPdNLS or dNLSd343.

Formatted: Not Highlight

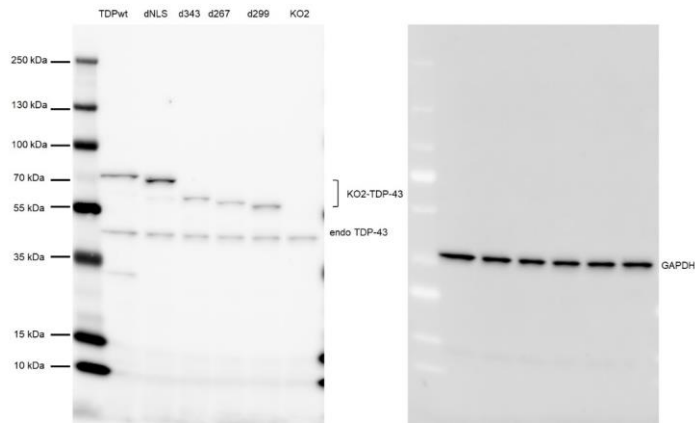

Figure S4: Original, uncropped and unadjusted images used for Figure 1. Membrane in first column: Primary antibody: Rabbit polyclonal anti-TDP-43 1:3000, #10782-2-AP Proteintech; Secondary antibody: anti-Rabbit Alexa 647 1:5000, Cell Signaling Molecular Probes. Membrane in second column: Primary antibody: mouse anti-GAPDH 1:5000, #60004-1-Ig Proteintech; Secondary antibody: anti-Mouse Alexa 488 1:5000, Cell Signaling Molecular Probes.

Formatted: Not Highlight

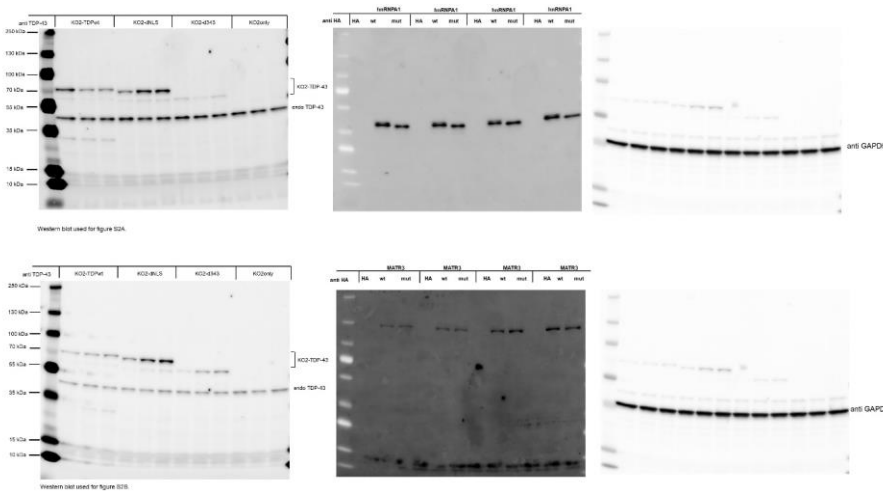

Figure S5: Original, uncropped and unadjusted images used for Figure S2A and S2B. Membranes in first column: Primary antibody: Rabbit polyclonal anti-TDP-43 1:3000, #10782-2-AP Proteintech; Secondary antibody: anti-Rabbit Alexa 647 1:5000, Cell Signaling Molecular Probes. Membranes in second column: Primary antibody: Mouse anti-HA 1:5000, #HA-7 Sigma; Secondary antibody: anti-Mouse Alexa 488 1:5000, Cell Signaling Molecular Probes. Membranes in third column: Membranes from the first column incubated with antibodies one more time. Primary antibody: Rabbit polyclonal anti-GAPDH 1:5000, #10494-1-AP Proteintech; Secondary antibody: anti-Rabbit Alexa 647 Cell Signaling Molecular Probes.

Formatted: Not Highlight

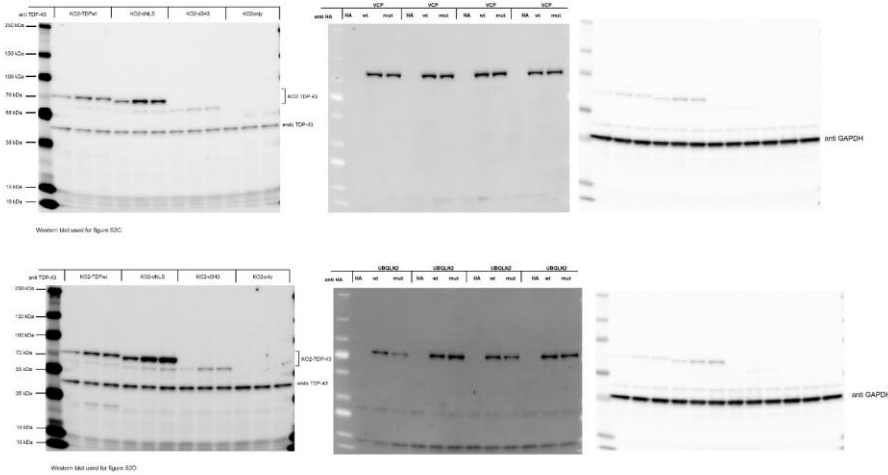

Figure S6: Original, uncropped and unadjusted images used for Figure S2A and S2B. Membranes in first column: Primary antibody: Rabbit polyclonal anti-TDP-43 1:3000, #10782-2-AP Proteintech; Secondary antibody: anti-Rabbit Alexa 647 1:5000, Cell Signaling Molecular Probes. Membranes in second column: Primary antibody: Mouse anti-HA 1:5000, #HA-7 Sigma; Secondary antibody: anti-Mouse Alexa 488 1:5000, Cell Signaling Molecular Probes. Membranes in third column: Membranes from the first column incubated with antibodies one more time. Primary antibody: Rabbit polyclonal anti-GAPDH 1:5000, #10494-1-AP Proteintech; Secondary antibody: anti-Rabbit Alexa 647 Cell Signaling Molecular Probes.

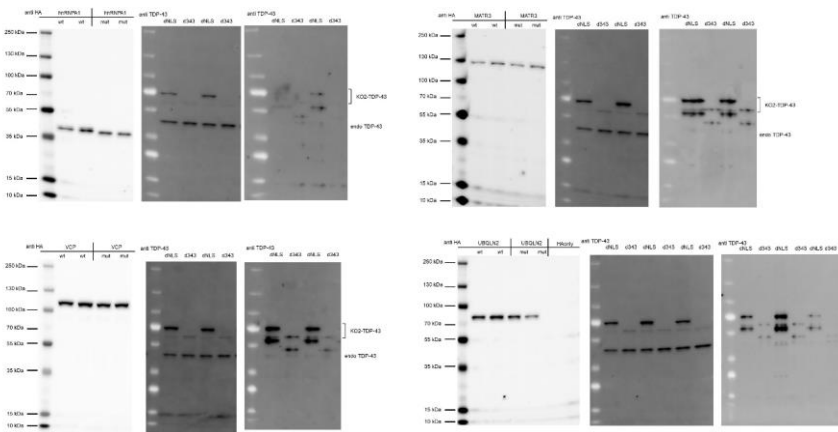

Figure S7: Original, uncropped and unadjusted images used for Figure S3. Membranes in first column: Primary antibody: Mouse anti-HA 1:5000, #HA-7 Sigma; Secondary antibody: anti-Mouse Alexa 647 1:5000 Cell Signaling Molecular Probes. Membranes in second and third column: Primary antibody: Rabbit polyclonal anti-TDP-43 1:3000, #10782-2-AP Proteintech; Secondary antibody: Anti-Rabbit Alexa 488 1:5000, Cell Signaling Molecular Probes.
